# Supplementary material for: Identifying the Genetic Variation of Gene Expression Using Gene Sets: Application of Novel Gene Set eQTL Approach to PharmGKB and KEGG
Source: PLoS One. 2012 Aug 14;7(8):e43301. doi: 10.1371/journal.pone.0043301 (PMC3419168; doi:10.1371/journal.pone.0043301)
Supplement: Table S1 — Categories of Gene Sets. (XLSX) [file pone.0043301.s001.xlsx]

## Sheet: Sheet1
Table S1: Categories of Gene Sets.
	Gene set Category	Gene set ID
PharmGKB	Alimentary_Tract_And_Metabolism	PA154423659
		PA153627758
		PA153627759
		PA146123006
		PA152530845
		PA152530846
	Blood_And_Blood_Forming_Organs	PA154424674
		PA154444041
		PA145011114
		PA145011113
	Cardiovascular_System	PA2023
		PA2033
		PA2024
		PA164713428
		PA2011
		PA165110621
		PA145011109
		PA2031
		PA145011111
		PA145011108
		PA145011110
		PA145011112
		PA2042
		PA2030
	Genito_Urinary_System_And_Sex_Hormones	PA145011120
		PA145011118
	Systemic_Hormonal_Preparations,_Excl.	PA2026
		PA2027
		PA2028
	Antiinfectives_For_Systemic_Use	PA165860384
		PA155028030
		PA165859361
	Antineoplastic_And_Immunomodulating_Agents	PA145011120
		PA145011119
		PA145011117
		PA165374494
		PA152241951
		PA2035
		PA2034
		PA165292163
		PA165292164
		PA165292177
		PA162356267
		PA154426903
		PA145011118
		PA2025
		PA165291507
		PA150653776
		PA165291575
		PA152325160
		PA2036
		PA2038
		PA2037
		PA164713427
		PA2029
		PA2001
		PA2039
		PA150642262
		PA154426155
		PA2040
		PA2032
		PA150981002
		PA155618789
	Musculo-skeletal_System	PA154423660
	Nervous_System	PA165111376
		PA165111375
		PA165817070
		PA164713429
		PA146123006
		PA161749012
		PA162359940
		PA162355620
		PA162355621
		PA2011
		PA145011115
		PA161749006
		PA2042
		PA2030
	Antiparasitic_Products,_Insecticides_And_Repellents	PA165815256
		PA165378192
	Respiratory_System	PA2024
		PA146123006
		PA2026
		PA2027
		PA2028
KEGG	Global_Map	01100
		01110
		01120
	Metabolism	00010
		00020
		00030
		00040
		00051
		00052
		00053
		00500
		00520
		00620
		00630
		00640
		00650
		00660
		00562
		00190
		00195
		00196
		00710
		00720
		00680
		00910
		00920
		00061
		00062
		00071
		00072
		00100
		00120
		00121
		00140
		00561
		00564
		00565
		00600
		00590
		00591
		00592
		01040
		00230
		00240
		00250
		00260
		00270
		00280
		00290
		00300
		00310
		00330
		00340
		00350
		00360
		00380
		00400
		00410
		00430
		00440
		00450
		00460
		00471
		00472
		00473
		00480
		00510
		00513
		00512
		00514
		00532
		00534
		00533
		00531
		00563
		00601
		00603
		00604
		00540
		00550
		00511
		00730
		00740
		00750
		00760
		00770
		00780
		00785
		00790
		00670
		00830
		00860
		00130
		00900
		00902
		00909
		00904
		00906
		00905
		00981
		00908
		00903
		00281
		01052
		00522
		01051
		01056
		01057
		00253
		00523
		01054
		01053
		01055
		00940
		00945
		00941
		00944
		00942
		00943
		00901
		00950
		00960
		01058
		00232
		00965
		00966
		00402
		00311
		00312
		00521
		00524
		00331
		00231
		00401
		00362
		00627
		00364
		00625
		00361
		00623
		00622
		00633
		00642
		00643
		00791
		00930
		00351
		00363
		00621
		00626
		00624
		00980
		00982
		00983
		01010
		01060
		01061
		01062
		01063
		01064
		01065
		01066
		01070
	Genetic_Information_Processing	03020
		03022
		03040
		03010
		00970
		03013
		03015
		03008
		03060
		04141
		04130
		04120
		04122
		03050
		03018
		03030
		03410
		03420
		03430
		03440
		03450
	Environmental_Information_Processing	02010
		02060
		03070
		02020
		04010
		04013
		04011
		04012
		04310
		04330
		04340
		04350
		04370
		04630
		04020
		04070
		04150
		04075
		04080
		04060
		04512
		04514
	Cellular_Processes	04144
		04145
		04142
		04146
		04140
		02030
		02040
		04810
		04110
		04111
		04112
		04113
		04114
		04210
		04115
		04510
		04520
		04530
		04540
	Organismal_Systems	04640
		04610
		04620
		04621
		04622
		04623
		04650
		04612
		04660
		04662
		04664
		04666
		04670
		04672
		04062
		04910
		04920
		03320
		04912
		04914
		04916
		04614
		04260
		04270
		04970
		04971
		04972
		04976
		04973
		04974
		04975
		04977
		04978
		04962
		04960
		04961
		04964
		04966
		04724
		04725
		04720
		04730
		04722
		04744
		04745
		04740
		04742
		04320
		04360
		04380
		04710
		04711
		04712
		04626
	Human_Diseases	05200
		05210
		05212
		05214
		05216
		05221
		05220
		05217
		05218
		05211
		05219
		05215
		05213
		05222
		05223
		05310
		05322
		05323
		05320
		05330
		05332
		05340
		05010
		05012
		05014
		05016
		05020
		05410
		05412
		05414
		05416
		04940
		04930
		04950
		05110
		05111
		05120
		05130
		05131
		05133
		05150
		05152
		05100
		05162
		05164
		05160
		05146
		05144
		05145
		05140
		05142
		05143
